# Supplementary material for: Filamentation Is Associated with Reduced Pathogenicity of Multiple Non-albicans Candida Species
Source: PubMed Central journal article supplement (PMC6796982; doi:10.1128/msphere.00656-19), 2019-10-16
Supplement: mSphere.00656-19-sf001.pdf [file mSphere.00656-19-sf001.pdf]

**A*****C. parapsilosis***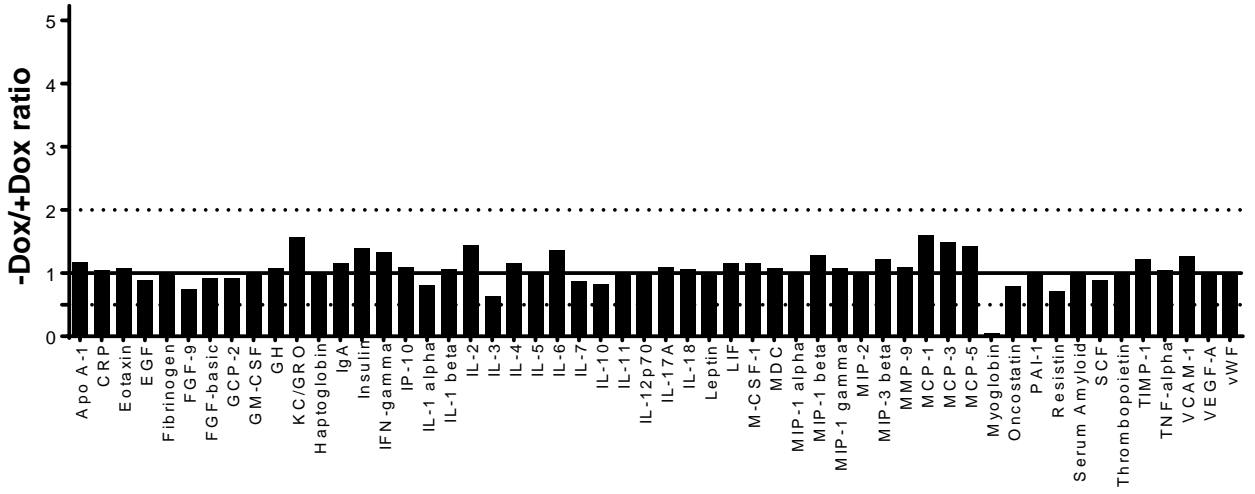**B*****C. tropicalis***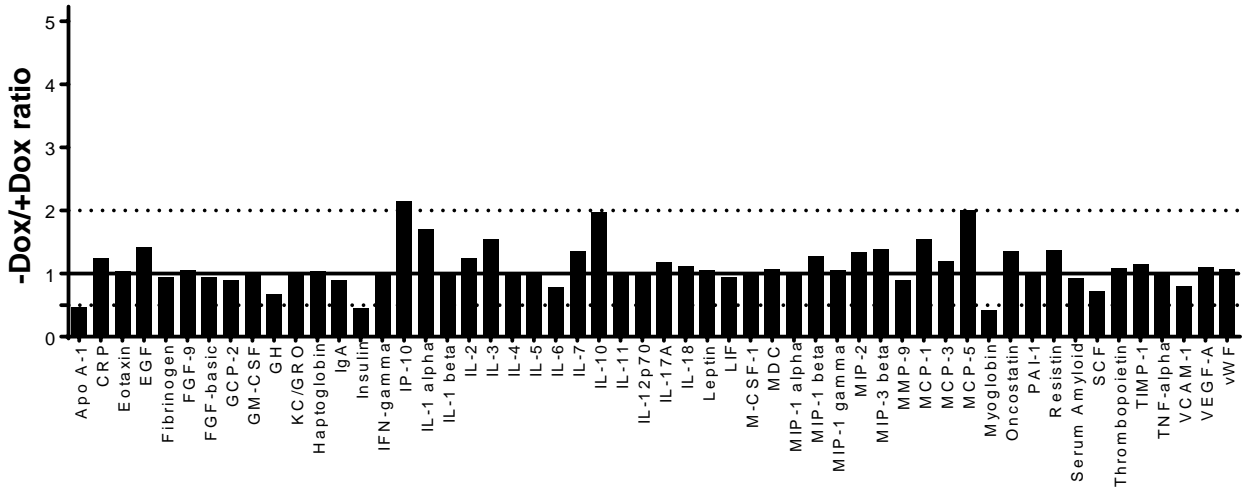**Figure S1**
